# Supplementary material for: Octahedral molybdenum clusters as radiosensitizers for X-ray induced photodynamic therapy
Source: Royal Society of Chemistry journal article supplement (doi:10.1039/c8tb00893k), 2018-01-01

## Electronic Supplementary Information

### Octahedral Molybdenum Clusters as Radiosensitizers for X-ray Induced Photodynamic Therapy

*Kaplan Kirakci,<sup>a\*</sup> Jaroslav Zelenka,<sup>b</sup> Michaela Rumlová,<sup>c</sup> Jiří Martinčík,<sup>d,e</sup> Martin Nikl,<sup>d</sup> Tomáš Ruml,<sup>b</sup> and Kamil Lang<sup>a\*</sup>*

<sup>a</sup>Institute of Inorganic Chemistry of the Czech Academy of Sciences, 250 68 Řež, Czech Republic

<sup>b</sup>Department of Biochemistry and Microbiology, University of Chemistry and Technology Prague, Technická 5, 166 28 Praha, Czech Republic

<sup>c</sup>Department of Biotechnology, University of Chemistry and Technology Prague, Technická 5, 166 28 Praha, Czech Republic

<sup>d</sup>Institute of Physics of the Czech Academy of Sciences, Cukrovarnická 10/112, 162 00 Praha, Czech Republic

<sup>e</sup>Czech Technical University in Prague, Faculty of Nuclear Sciences and Physical Engineering, Břehová 7, 115 19 Praha, Czech Republic

\* Corresponding authors

#### Content

Figure S1. FTIR spectra of starting compound **1** and **1NPs**.

Figure S2. Powder X-ray diffraction pattern of starting compound **1** and **1NPs**.

Figure S3. SEM images of **1NPs** and size distribution obtained by dynamic light scattering.

Figure S4. Zeta potentials of **1NPs**.

Figure S5. Concentration-dependent uptake of **1NPs**.

Figure S6. Time-dependent uptake of **1NPs**.

Figure S7. Bright field image of HeLa cells merged with a confocal image of **1NPs**.

Figure S8. Uptake and photodynamic effects of **1NPs** on MRC fibroblast cells.

Figure S9. Bright field image of the HeLa cell colony formation.

Figure S10. Percentage of necrotic and apoptotic HeLa cells 48 h after X-ray irradiation.

**Figure S1.** FTIR spectra of starting compound **1** (a) and **1NPs** (b).

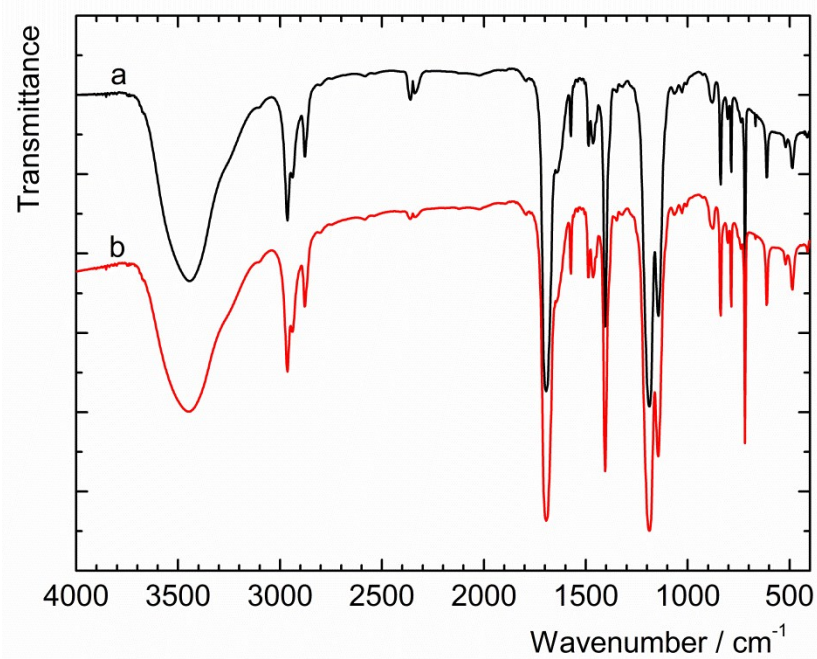

**Figure S2.** Powder X-ray diffraction pattern of starting compound **1** (a) and **1NPs** (b).

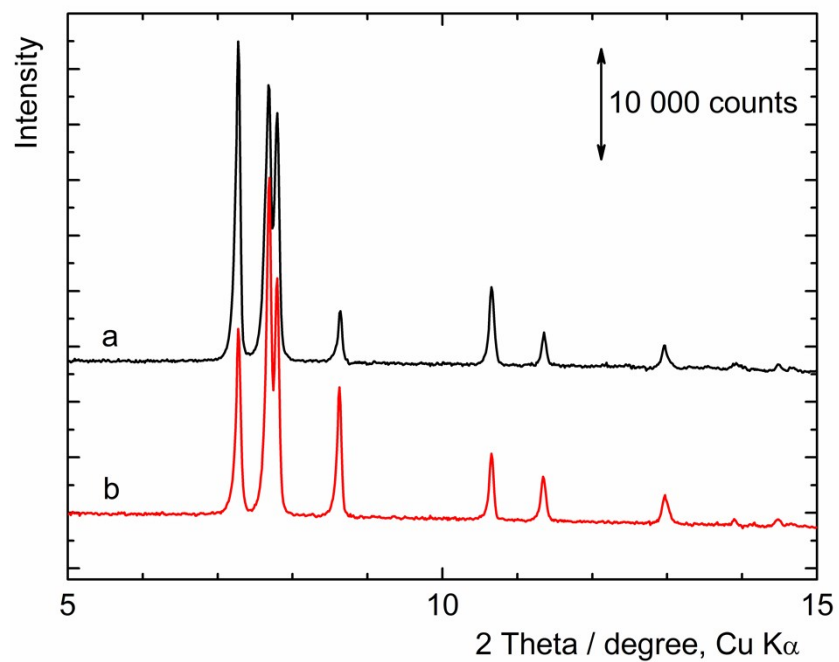

**Figure S3.** Selected SEM images of 1NPs (A) and size distribution obtained by dynamic light scattering in fresh (B) and seven days old (C) dispersions in phosphate-buffered saline.

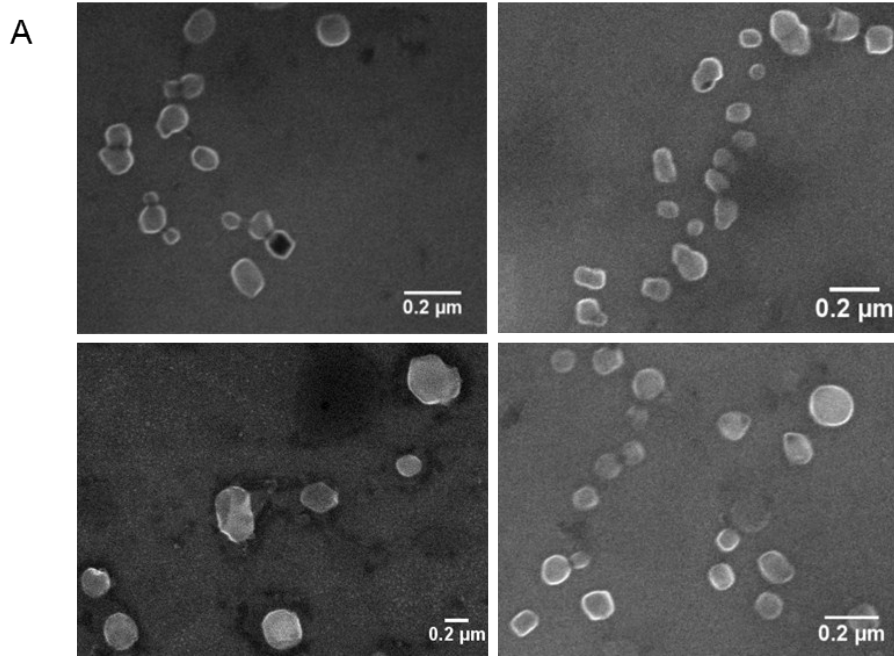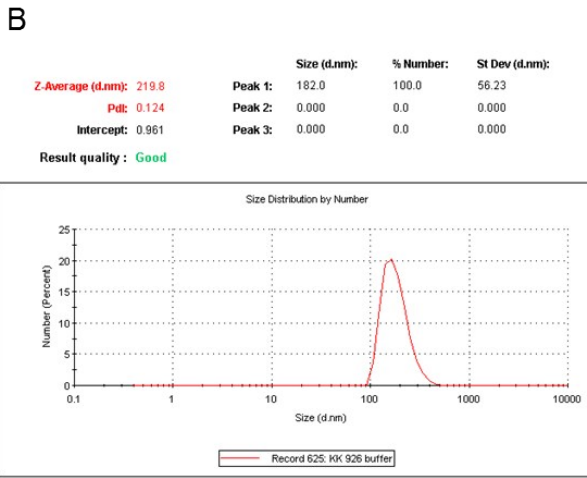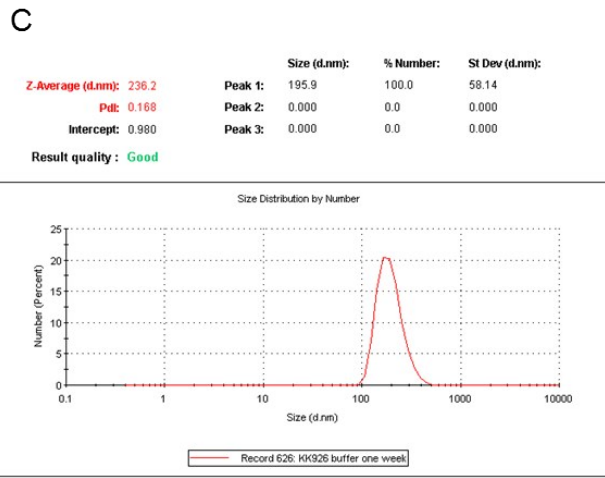

**Figure S4.** Zeta potentials of **INPs** in phosphate-buffered saline including data from three measurements.

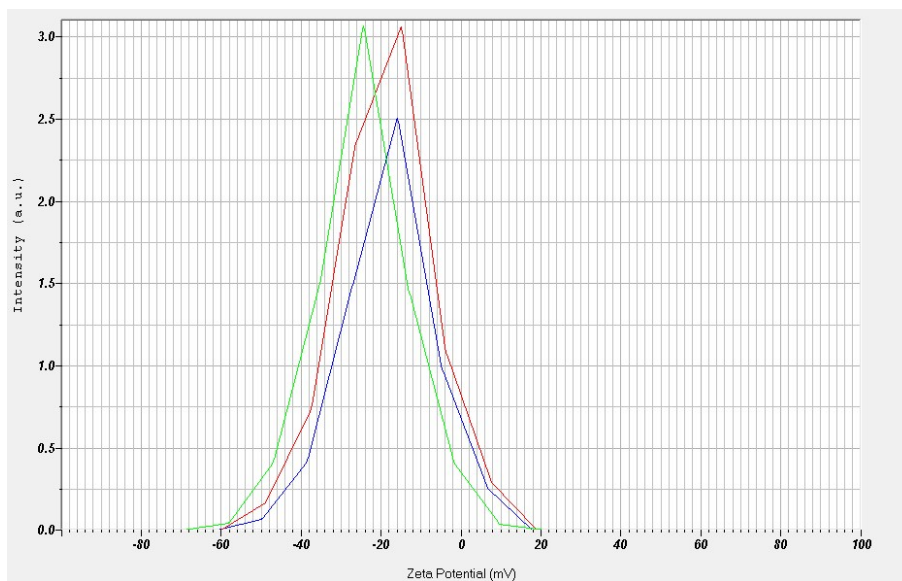

| Measurement | Zeta Potential / mV |
|-------------|---------------------|
| 1           | -24.4               |
| 2           | -18.9               |
| 3           | -17.9               |
| Average     | -20.4               |
| S. D.       | 3.5                 |

**Figure S5.** Concentration-dependent uptake of **INPs**. HeLa cells were loaded with the indicated concentrations of **INPs** for 120 minutes and the fluorescence with excitation/emission wavelengths 405/655-685 nm associated with the cells was recorded with the fluorescence-activated cell sorting. Mock cells are in grey, the growing concentration of nanoparticles is represented by darkening of the tones of green: 0.3, 0.6, 1.5, 3, and 6  $\mu\text{M}$ .

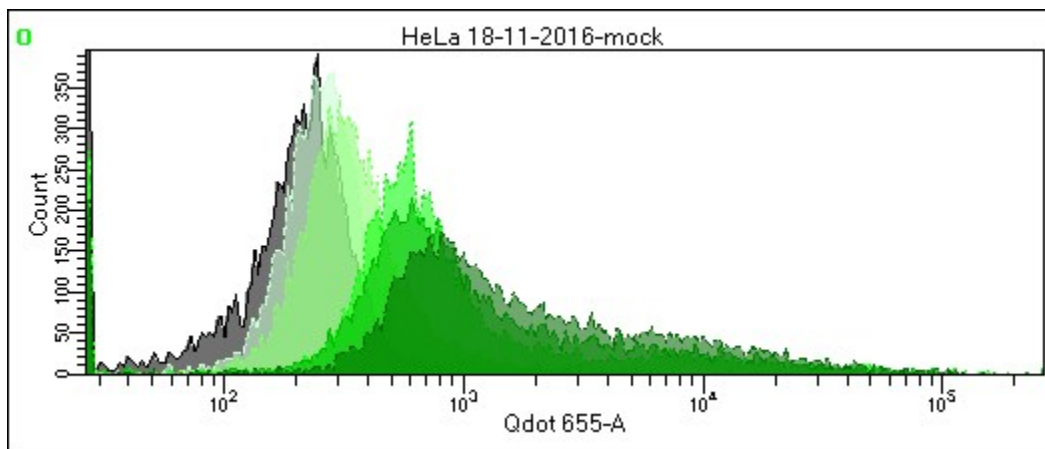

**Figure S6.** Time-dependent uptake of **INPs**. HeLa cells were loaded with **INPs** at concentration of 6  $\mu\text{M}$  for the indicated time period and the fluorescence with excitation/emission wavelengths 405/655-685 nm associated with the cells was recorded with the fluorescence-activated cell sorting. Mock cells are in grey, the increasing uptake time is represented by the darkening of the tones of green: 30, 60, 90 and 120 min.

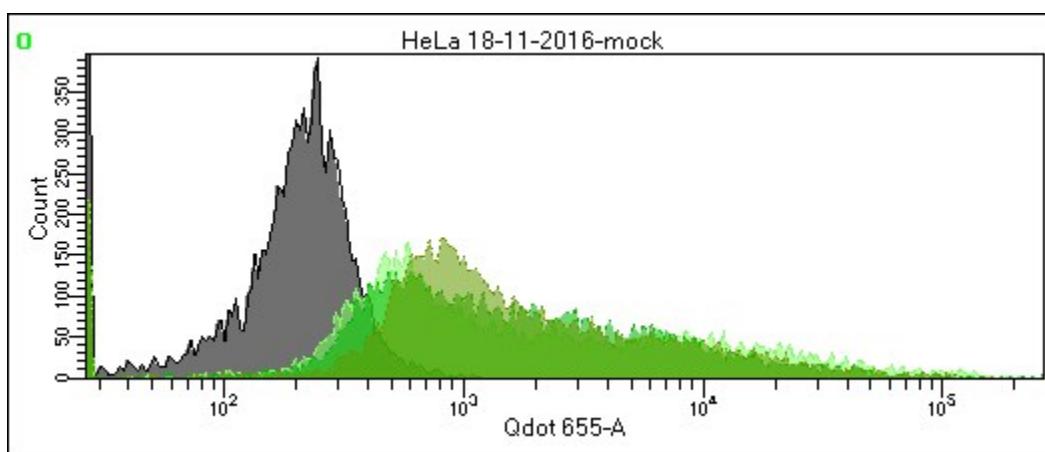

**Figure S7.** Bright field image of HeLa cells merged with a confocal image of **1NPs** (red) after 2 h incubation. White bar represents 100  $\mu\text{m}$ .

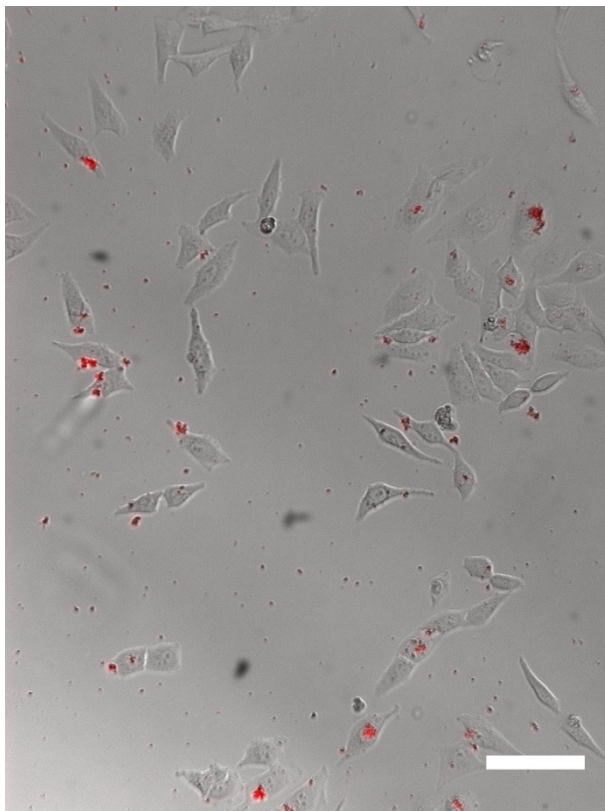

**Figure S8.** Uptake and photodynamic effects of **1NPs** on MRC fibroblast cells.

A) Concentration-dependent uptake of **1NPs** in fibroblasts. Fibroblasts were loaded with the indicated concentrations of **1NPs** for 120 minutes and the fluorescence with excitation/emission wavelengths 405/655-685 nm associated with the cells was recorded with the fluorescence-activated cell sorting. Mock cells are in grey, the growing concentration of nanoparticles is represented by darkening of the tones of green: 0.6, 1.5, 3, and 6  $\mu\text{M}$ .

B) Relative uptake of **1NPs**. Dose-dependent uptake of **1NPs** after 2h incubation as follows from flow cytometry analysis. The axis y represents the fluorescence intensity of cells.

C) Dark toxicity and phototoxicity of **1NPs**. MRC fibroblast cells were loaded with **1NPs** using indicated concentrations for 2 h and irradiated with 460 nm light ( $20 \text{ mW cm}^{-2}$ ) for 15 minutes. The bars labeled as 0 belong to control experiments, i.e., the cells irradiated in the absence of **1NPs**.

A

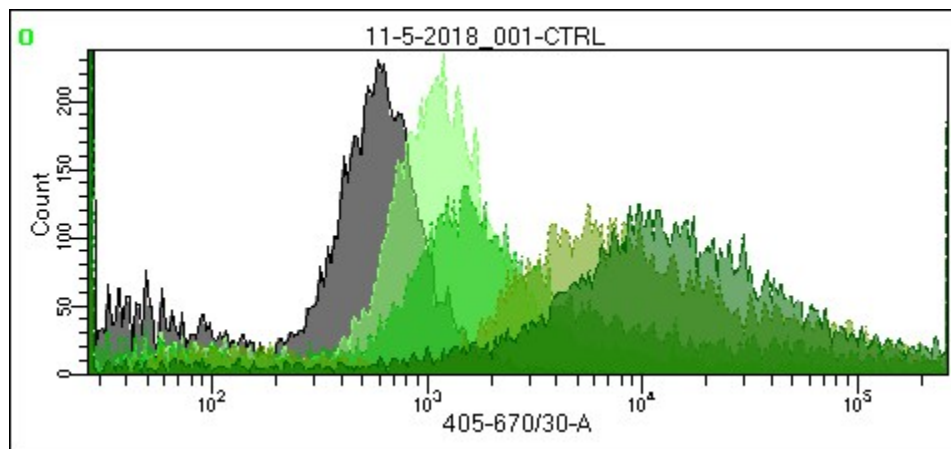

B

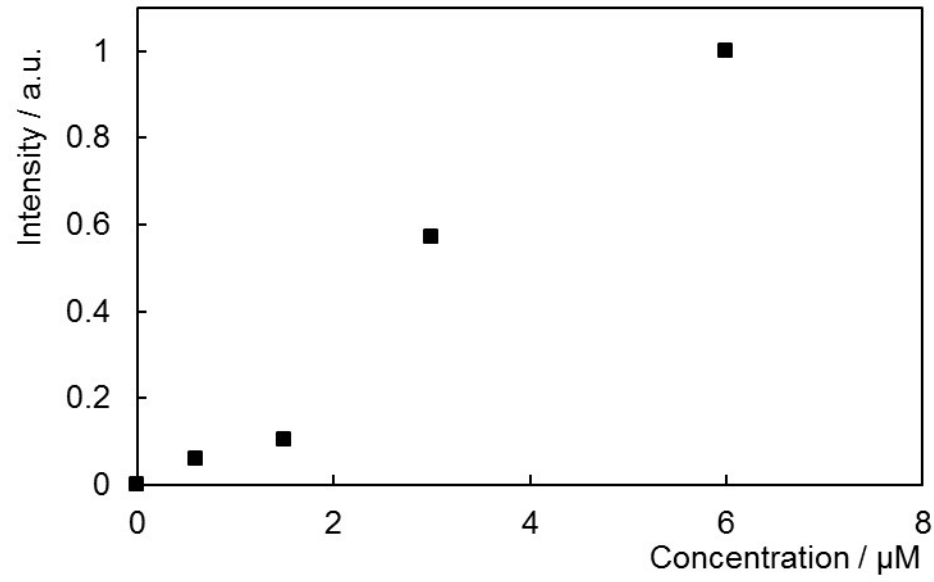

C

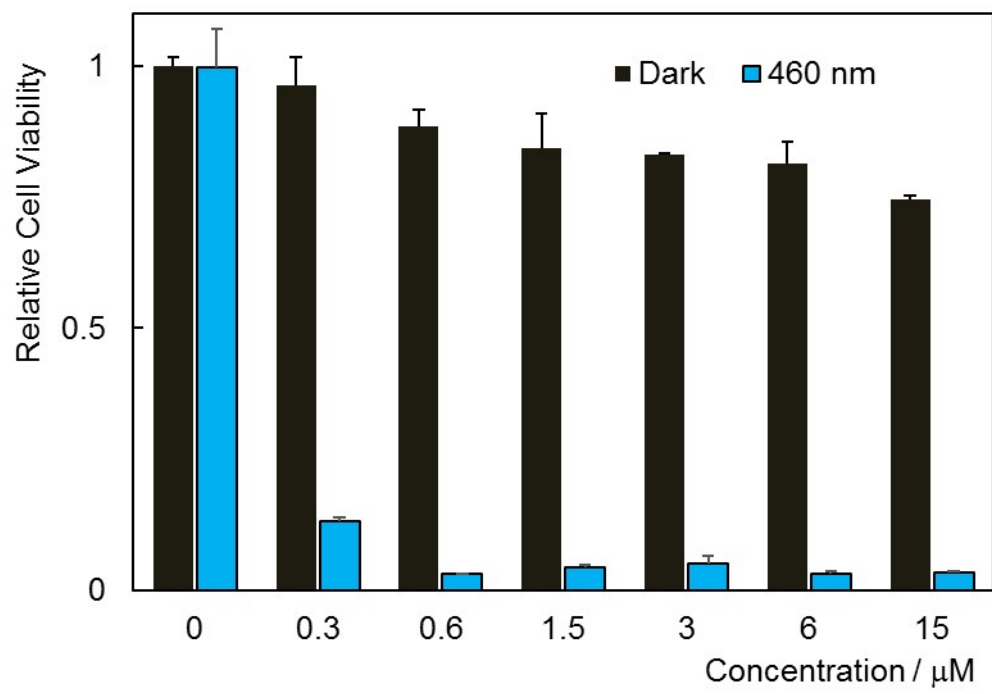



**Figure S9.** Bright field image of the HeLa cell colony-forming assay. Control (A), irradiated by 4 Gy (B), and irradiated by 4 Gy after incubation with 3  $\mu$ M 1NPs (C). HeLa cells were seeded at 10x lower density and cultured for 4 days. White bar represents 100  $\mu$ m.

A

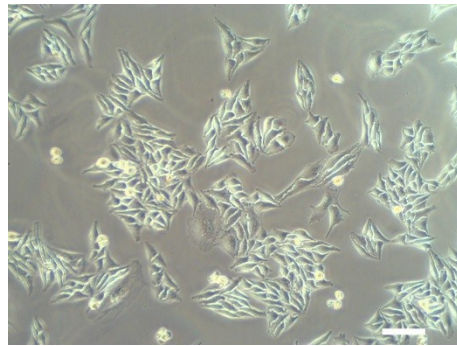

B

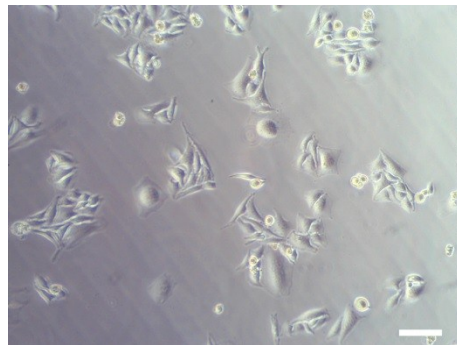

C

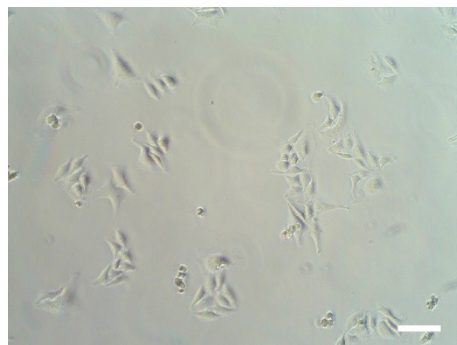

**Figure S10.** Percentage of necrotic (A) and apoptotic (B) HeLa cells 48 h after X-ray irradiation was determined with FACS analysis. The cells were treated with 3  $\mu$ M **1NPs** for 2 hours and subsequently irradiated with X-rays to receive the indicated dose (black bars). The empty bars are for control experiments performed in the absence of **1NPs**.

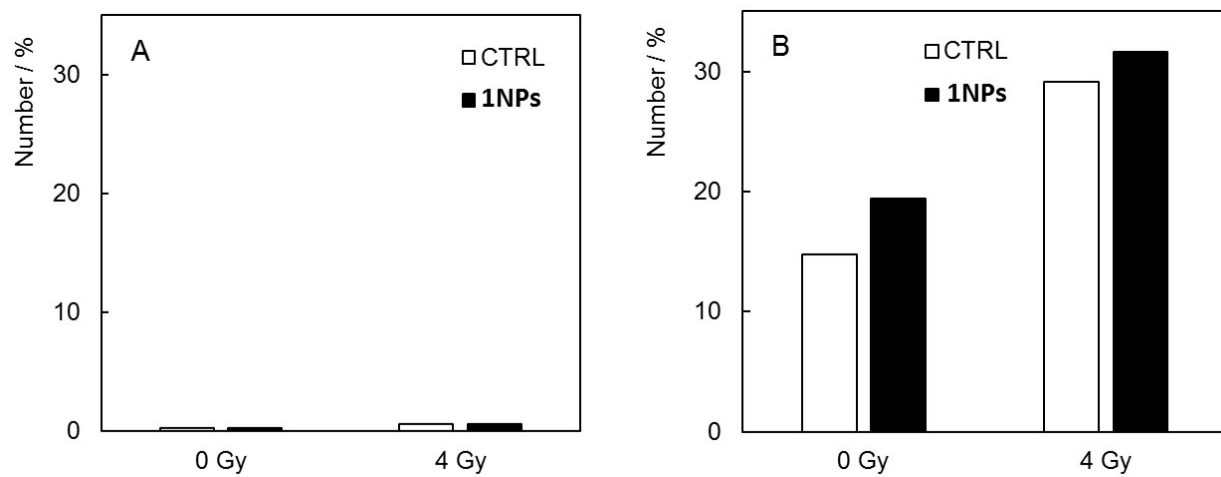

Supplement: c8tb00893k1.pdf [file c8tb00893k1.pdf]
